# Supplementary material for: One-pot preparation of BAB triblock copolymer nano-objects through bifunctional macromolecular RAFT agent mediated dispersion polymerization
Source: Royal Society of Chemistry journal article supplement (doi:10.1039/c5py01917f), 2016-01-01
Supplement: c5py01917f1.pdf [file c5py01917f1.pdf]

## Supporting Information for

### One-pot preparation of BAB triblock copolymer nano-objects through bifunctional macromolecular RAFT agent mediated dispersion polymerization

Yaqing Qu,<sup>a</sup> Shuang Wang,<sup>a</sup> Habib Khan,<sup>a</sup> Chengqiang Gao,<sup>a</sup> Heng Zhou<sup>a</sup> and Wangqing Zhang<sup>\*a,b</sup>

<sup>a</sup>Key Laboratory of Functional Polymer Materials of the Ministry of Education, Institute of Polymer Chemistry, Nankai University, Tianjin 300071, China.

<sup>b</sup>Collaborative Innovation Center of Chemical Science and Engineering (Tianjin), Nankai University, Tianjin 300071, China.

\*To whom correspondence should be addressed. E-mail: wqzhang@nankai.edu.cn, Tel: 86-22-23509794, Fax: 86-22-23503510.

#### 1. TEM sampling of the stained PS<sub>273</sub>-*b*-P4VP<sub>48</sub>-*b*-PS<sub>273</sub> triblock copolymer nano-objects

**Preparation of the CH<sub>3</sub>I-stained PS<sub>273</sub>-*b*-P4VP<sub>48</sub>-*b*-PS<sub>273</sub> nano-objects.** Into a flask, the methanol dispersion of PS<sub>273</sub>-*b*-P4VP<sub>48</sub>-*b*-PS<sub>273</sub> triblock copolymer nano-objects (1.00 g, 0.2 wt%) and the methanol solution of CH<sub>3</sub>I (1.43 g, 0.03 wt%) were added, in which the molar ratio of the pyridine ligand in PS<sub>273</sub>-*b*-P4VP<sub>48</sub>-*b*-PS<sub>273</sub> to CH<sub>3</sub>I was set at 1:2. This mixture was kept at room temperature with stirring for 3 days, and then the stained PS<sub>273</sub>-*b*-P4VP<sub>48</sub>-*b*-PS<sub>273</sub> triblock copolymer nano-objects were checked by TEM.

**Preparation of the HCl-acidified PS<sub>273</sub>-*b*-P4VP<sub>48</sub>-*b*-PS<sub>273</sub> nano-objects.** Into HCl aqueous solution (1.00 g, pH = 1), the methanol dispersion of PS<sub>273</sub>-*b*-P4VP<sub>48</sub>-*b*-PS<sub>273</sub> triblock copolymer nano-objects (0.02 mL, 5.30 wt%) was added. This mixture was kept at room temperature with stirring for 3 days, and then the acidified PS<sub>273</sub>-*b*-P4VP<sub>48</sub>-*b*-PS<sub>273</sub> triblock copolymer nano-objects were checked by TEM.

**2. Table S1**

| polymer                                                                        | $M_n$ (kg/mol) |                |                | $\bar{D}_1^d$ | $\bar{D}_2^e$ |
|--------------------------------------------------------------------------------|----------------|----------------|----------------|---------------|---------------|
|                                                                                | $M_{n,th}^a$   | $M_{n,GPC1}^b$ | $M_{n,GPC2}^c$ |               |               |
| TTC-P4VP <sub>48</sub> -TTC                                                    | 5.7            | 7.1            | 18.5           | 1.31          | 1.29          |
| PS <sub>52</sub> - <i>b</i> -P4VP <sub>48</sub> - <i>b</i> -PS <sub>52</sub>   | 16.6           | 9.0            | 24.8           | 1.34          | 1.31          |
| PS <sub>273</sub> - <i>b</i> -P4VP <sub>48</sub> - <i>b</i> -PS <sub>273</sub> | 62.6           | 52.8           | 67.8           | 1.36          | 1.35          |

<sup>a</sup> The theoretical molecular weight determined by monomer conversion according to eqn 1. <sup>b</sup> The molecular weight determined by GPC analysis using PMMA as calibration standard. <sup>c</sup> The molecular weight determined by GPC analysis using PS as calibration standard. <sup>d</sup> The  $\bar{D}$  ( $M_w/M_n$ ) values determined by GPC analysis using PMMA as calibration standard. <sup>e</sup> The  $\bar{D}$  ( $M_w/M_n$ ) values determined by GPC analysis using PS as calibration standard.

**3. Scheme S1**

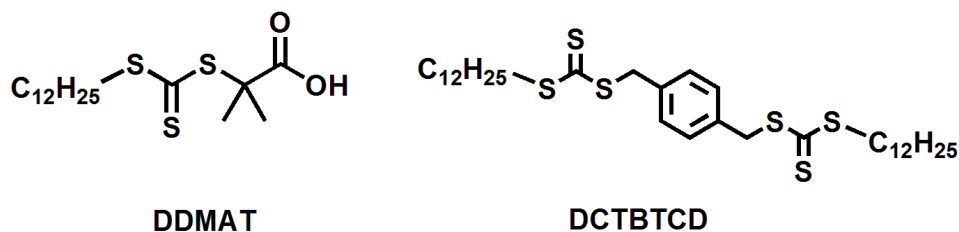

**Scheme S1.** The chemical structures of the monofunctional RAFT agent of DDMAT and the bifunctional RAFT agent of DCTBTCD.

#### 4 Equation

$$M_{n,NMR} = \frac{(I_{7.22 \sim 6.26} - I_{8.30}) \times 2}{I_{8.30} \times 5} \times DP_{4VP} \times M_{n,St} + M_{n,TTC-P4VP-TTC} \quad (S1)$$

#### 5. Figures

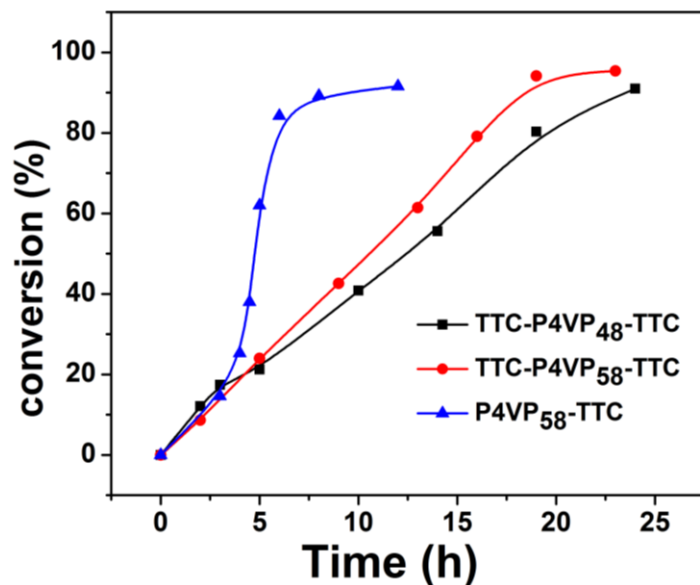

**Fig S1.** The monomer conversion-time plot for the dispersion RAFT polymerization of styrene in the presence of TTC-P4VP<sub>48</sub>-TTC, TTC-P4VP<sub>58</sub>-TTC and P4VP<sub>58</sub>-TTC respectively. Polymerization conditions for the P4VP<sub>58</sub>-TTC macro-RAFT agent mediated dispersion polymerization:  $[St]_0:[P4VP_{58}\text{-TTC}]_0:[AIBN]_0 = 600:1:1/6$ , 70 °C, the fed St monomer concentration being at 28 wt%. The polymerization conditions for the TTC-P4VP<sub>48</sub>-TTC or TTC-P4VP<sub>58</sub>-TTC bifunctional macro-RAFT agent mediated dispersion polymerization can be found in Figure 3.

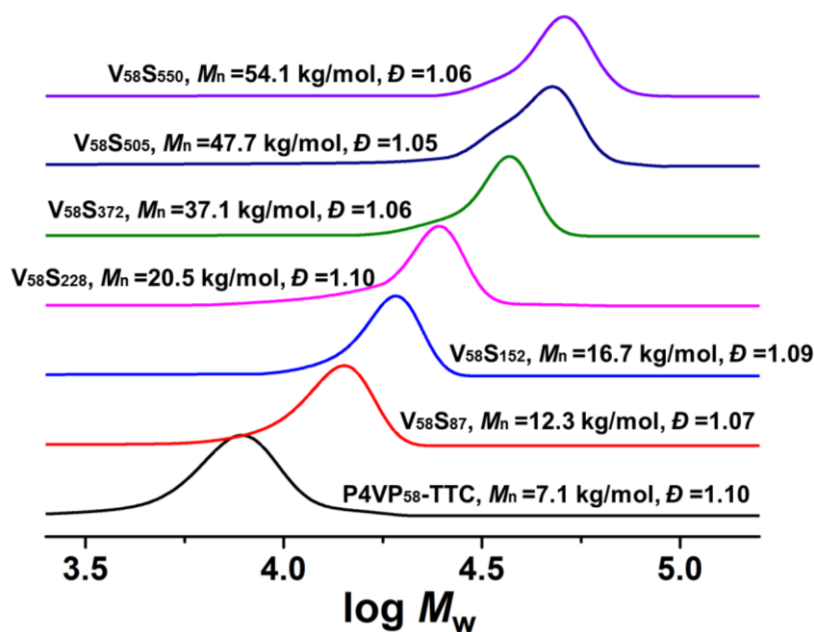

**Fig S2.** The GPC traces of the P4VP-*b*-PS diblock copolymers prepared through the monofunctional P4VP<sub>58</sub>-TTC macro-RAFT agent mediated dispersion polymerization

(P4VP-*b*-PS is briefly called VS, in which S represents the PS block and V represents the P4VP block).

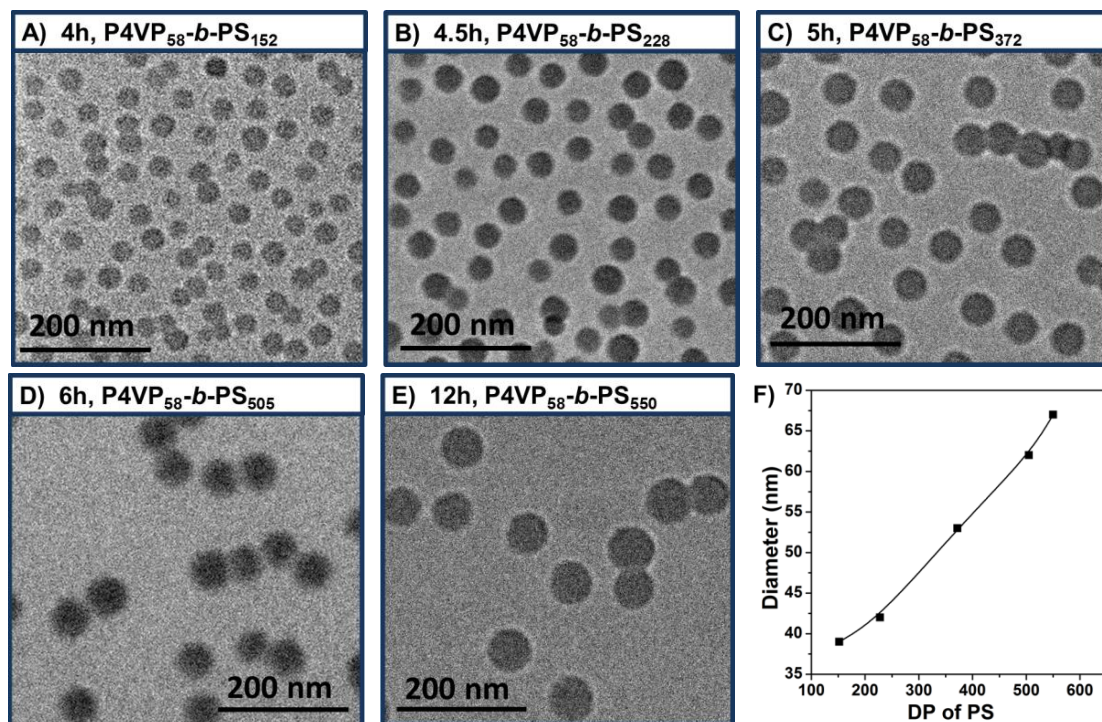

**Fig S3.** TEM images and the average size of the P4VP-*b*-PS diblock copolymers prepared through the monofunctional P4VP<sub>58</sub>-TTC macro-RAFT agent mediated dispersion polymerization.

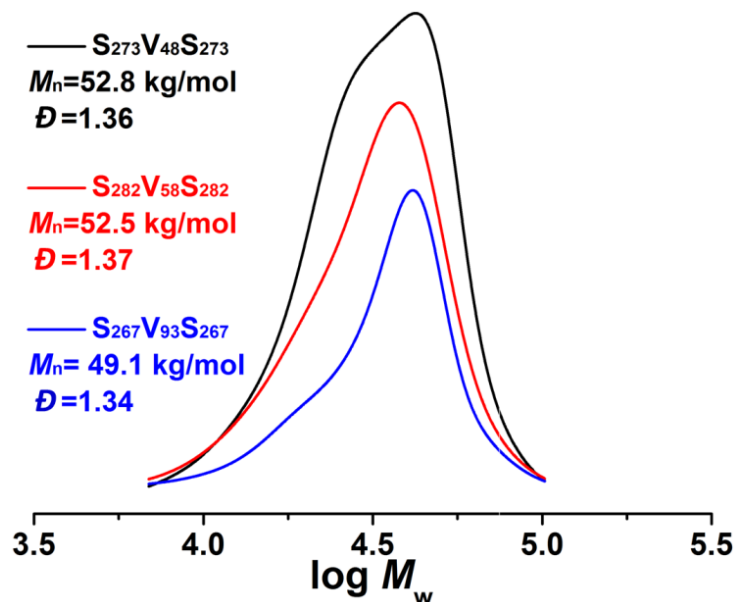

**Fig S4.** The GPC traces of the PS-*b*-P4VP-*b*-PS triblock copolymers of  $S_{273}V_{48}S_{273}$ ,  $S_{282}V_{58}S_{282}$ ,  $S_{267}V_{93}S_{267}$  (PS-*b*-P4VP-*b*-PS is briefly called SVS, in which S represents the PS block and V represents the P4VP block).

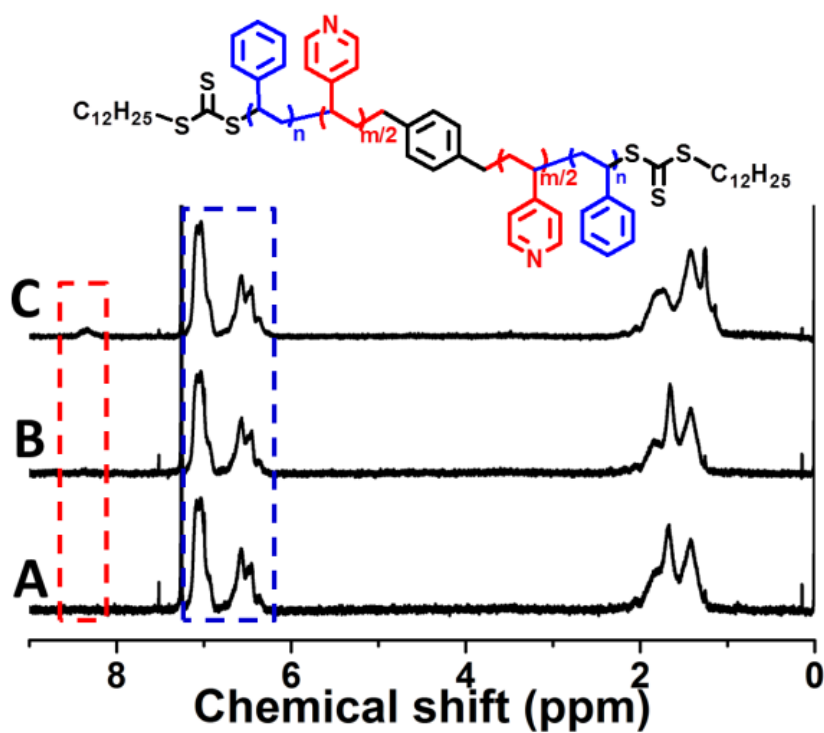

**Fig S5.** The  $^1\text{H}$  NMR spectra of the triblock copolymers of  $\text{PS}_{273}\text{-}b\text{-P4VP}_{48}\text{-}b\text{-PS}_{273}$  (A),  $\text{PS}_{282}\text{-}b\text{-P4VP}_{58}\text{-}b\text{-PS}_{282}$  (B),  $\text{PS}_{267}\text{-}b\text{-P4VP}_{93}\text{-}b\text{-PS}_{267}$  (C).

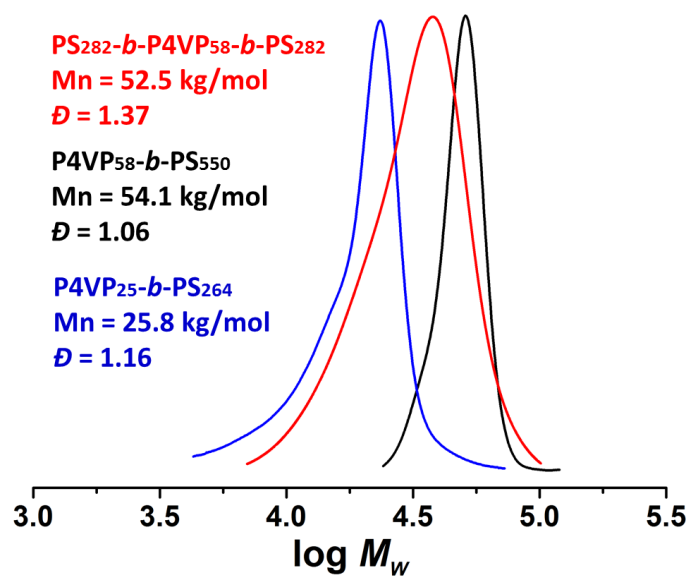

**Fig S6.** The GPC traces of  $\text{PS}_{282}\text{-}b\text{-P4VP}_{58}\text{-}b\text{-PS}_{282}$ ,  $\text{P4VP}_{58}\text{-}b\text{-PS}_{550}$  and  $\text{P4VP}_{25}\text{-}b\text{-PS}_{264}$ .

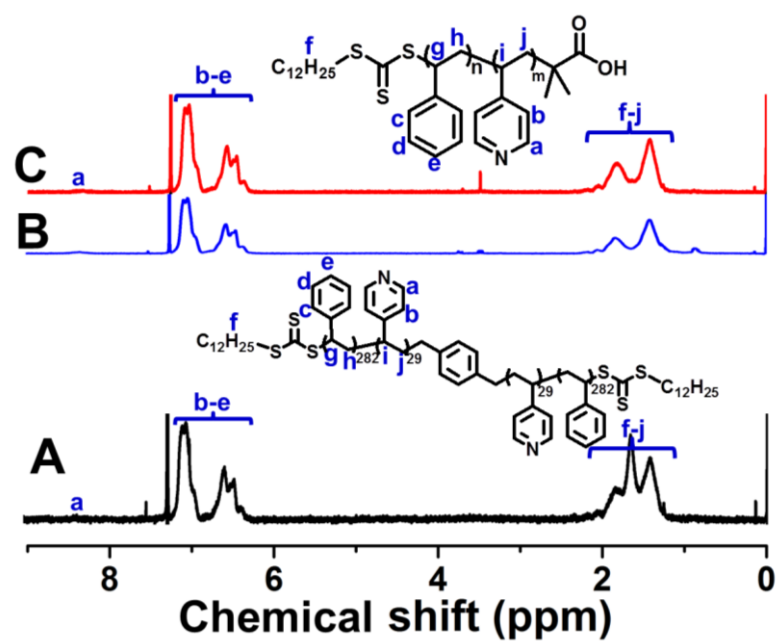

**Fig S7.** The  $^1\text{H}$  NMR spectra of  $\text{PS}_{282}\text{-}b\text{-P4VP}_{58}\text{-}b\text{-PS}_{282}$  (A),  $\text{P4VP}_{25}\text{-}b\text{-PS}_{264}$  (B) and  $\text{P4VP}_{58}\text{-}b\text{-PS}_{550}$  (C).
